# Supplementary material for: Fullerene-based single molecule diodes with huge rectification ratios: a DFT-NEGF study
Source: Royal Society of Chemistry journal article supplement (doi:10.1039/d4tc04233f), 2025-01-01
Supplement: d4tc04233f1.pdf [file d4tc04233f1.pdf]

## Supporting Information

# Fullerene-based Single Molecule Diodes with Huge Rectification Ratios: A DFT-NEGF Study

Minjing Zhang<sup>a</sup>, Zhaodi Yang<sup>a</sup>, and Si-Dian Li<sup>a,\*</sup> and Yuewen Mu<sup>a,\*</sup>

<sup>a</sup>Key Laboratory of Materials for Energy Conversion and Storage of Shanxi Province, Key Laboratory of Chemical Biology and Molecular Engineering of the Education Ministry, Institute of Molecular Science, Shanxi University, Taiyuan, 030006, China.

Email: [lisidian@sxu.edu.cn](mailto:lisidian@sxu.edu.cn); [ywmu@sxu.edu.cn](mailto:ywmu@sxu.edu.cn)

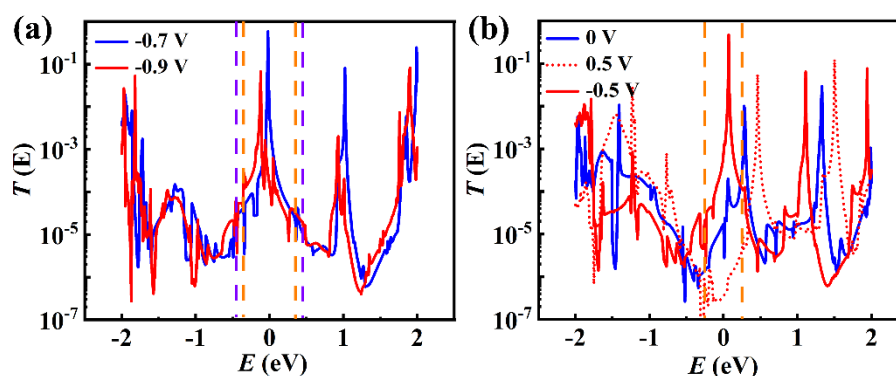

Figure S1. Transmission spectra of the S-DPA-N-C<sub>60</sub> device under the bias of (a) -0.7 V, -0.9 V and (b) 0 V, ±0.5 V. The purple/yellow dashed lines are the boundaries of the bias windows.

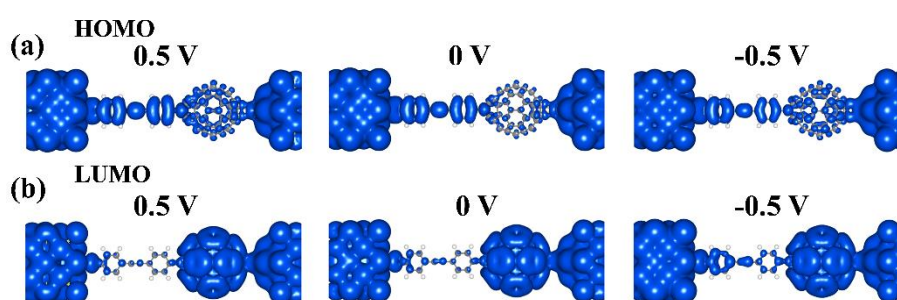

Figure S2. Real space local density of states of (a) HOMO and (b) LUMO orbitals of the S-DPA-N-C<sub>60</sub> device under  $V_b = 0$  V, ±0.5 V.

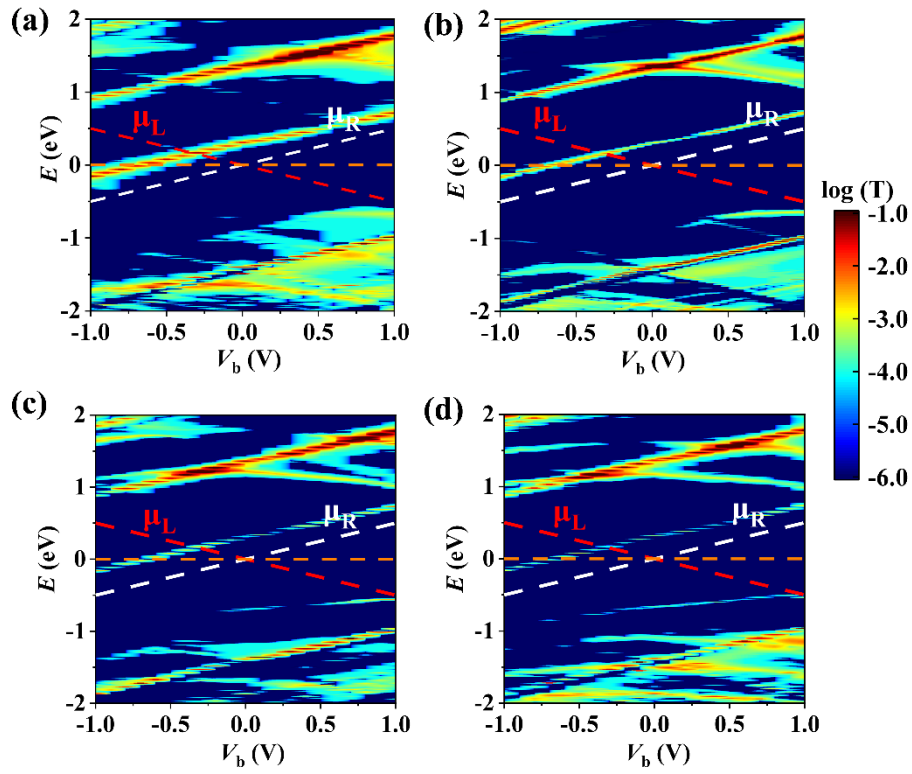

Figure S3. Transmission spectra ( $T(E, V_b)$ ) of S-C<sub>6</sub>H<sub>4</sub>-(C≡C-C<sub>6</sub>H<sub>4</sub>)<sub>*n*</sub>-N-C<sub>60</sub> devices with different lengths (a)  $n = 2$  (b)  $n = 3$  (c)  $n = 4$  and (d)  $n = 5$  under bias  $V_b \in [-1, 1]$  V.

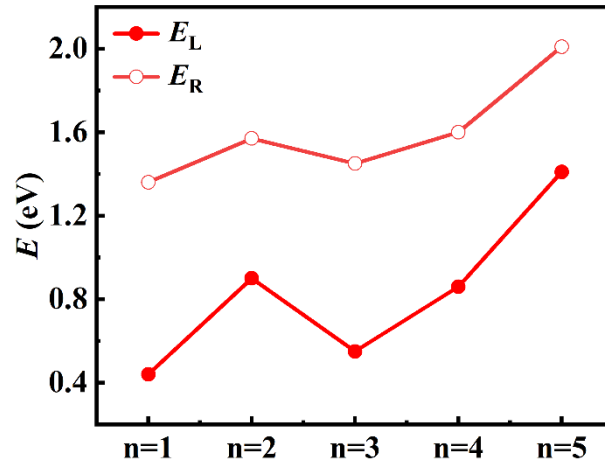

Figure S4. Variation of interactions at the interfaces between the molecule and buffer layers with the length of the molecule for S-C<sub>6</sub>H<sub>4</sub>-(C≡C-C<sub>6</sub>H<sub>4</sub>)<sub>*n*</sub>-N-C<sub>60</sub> devices. .

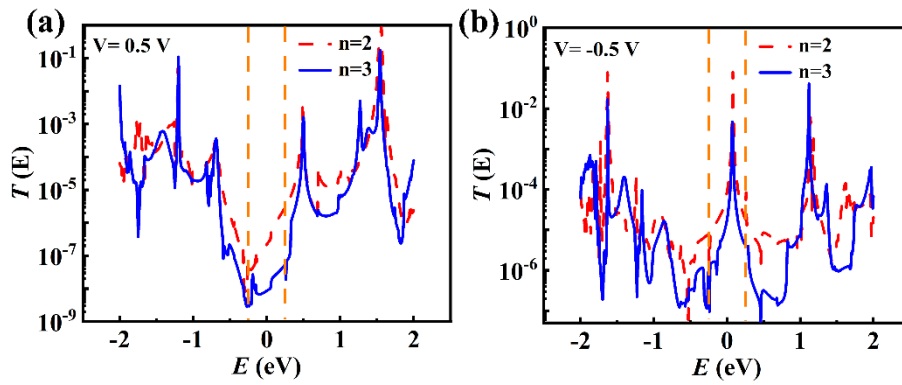

Figure S5. Transmission spectra of  $S-C_6H_4-(C\equiv C-C_6H_4)_n-N-C_{60}$  devices with  $n = 2$  and  $n = 3$  under the bias of (a) 0.5 V and (b) -0.5 V.

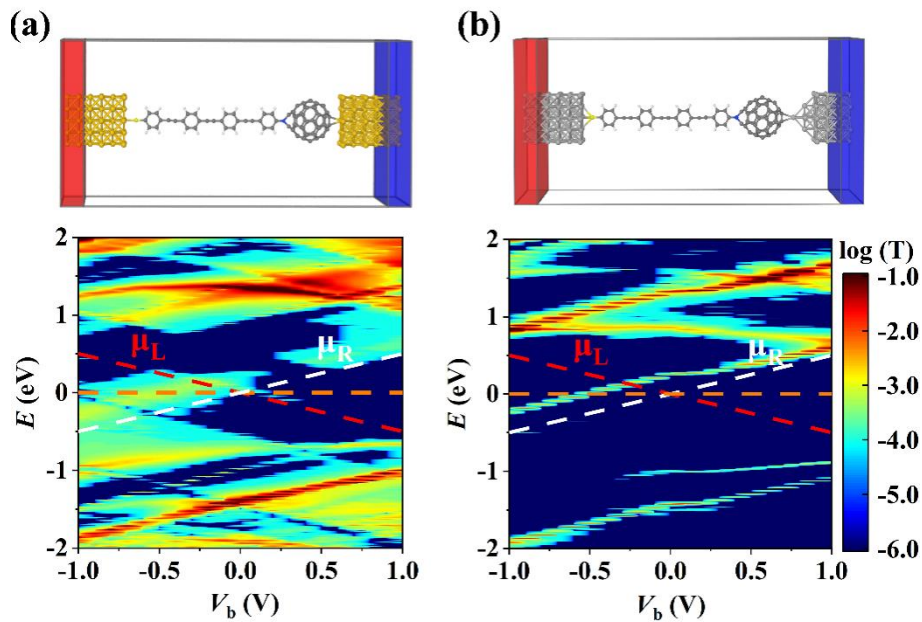

Figure S6. Transmission spectra ( $T(E, V_b)$ ) of  $S-C_6H_4-(C\equiv C-C_6H_4)_3-N-C_{60}$  devices with gold terrace (ter) right electrode ( $Au_{ter}$ ) and silver tip right electrode ( $Ag_{tip}$ ).

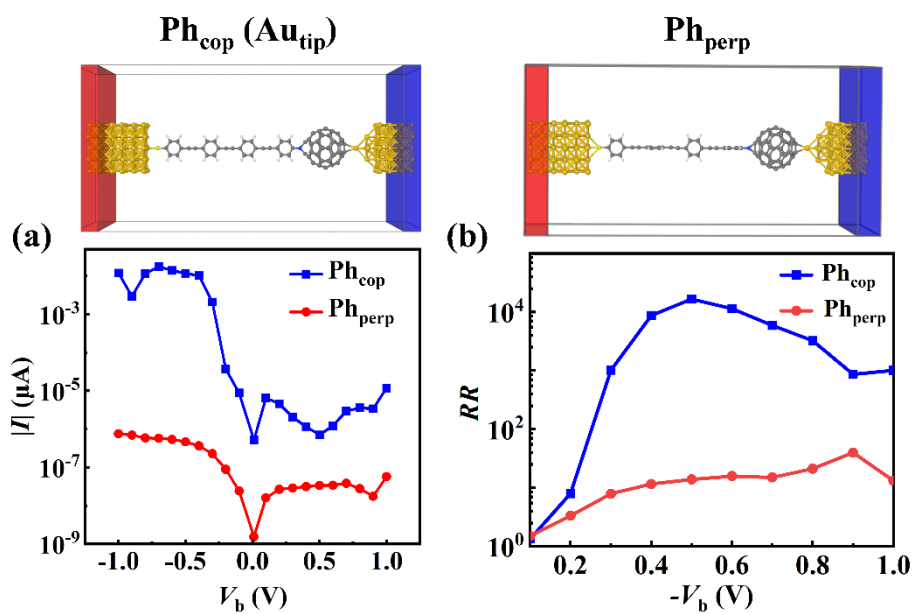

Figure S7. (a) Current-voltage ( $I$ - $V_b$ ) curves and (b) rectification ratio (RR) curves for S-C<sub>6</sub>H<sub>4</sub>-(-C≡C-C<sub>6</sub>H<sub>4</sub>)<sub>3</sub>-N-C<sub>60</sub> device with coplanar (cop) and perpendicular (perp) phenylacetylenes (Ph).
